# Supplementary material
Source: HighWire-hosted journal article supplement (https://bmjopen.bmj.com/content/10/11/e040736)

## Supplementary Material

### Supplementary Methods

#### Mount Sinai Covid Informatics Center (MSCIC) Data Platform

This dataset of clinical data is the first part of a larger effort that aims to create an heterogeneous collection of COVID-19 patient data. This effort brings together different stakeholders from MSHS, including research faculty, data scientists, clinicians, and hospital administrators, among others. The resulting dataset includes or will include longitudinal electronic health record (EHR) patient clinical data, multi-omics, such as genomics, imaging, such as chest CT scans, among others. The data, which are updated on a daily basis, is made available within a secure computational framework based on internal Microsoft Azure Cloud to researchers and analysts within the MSHS and the Icahn School of Medicine at Mount Sinai. This dataset is intended to foster research projects to improve the knowledge of this disease and augment clinical operations with machine intelligence.

### Supplementary Figures

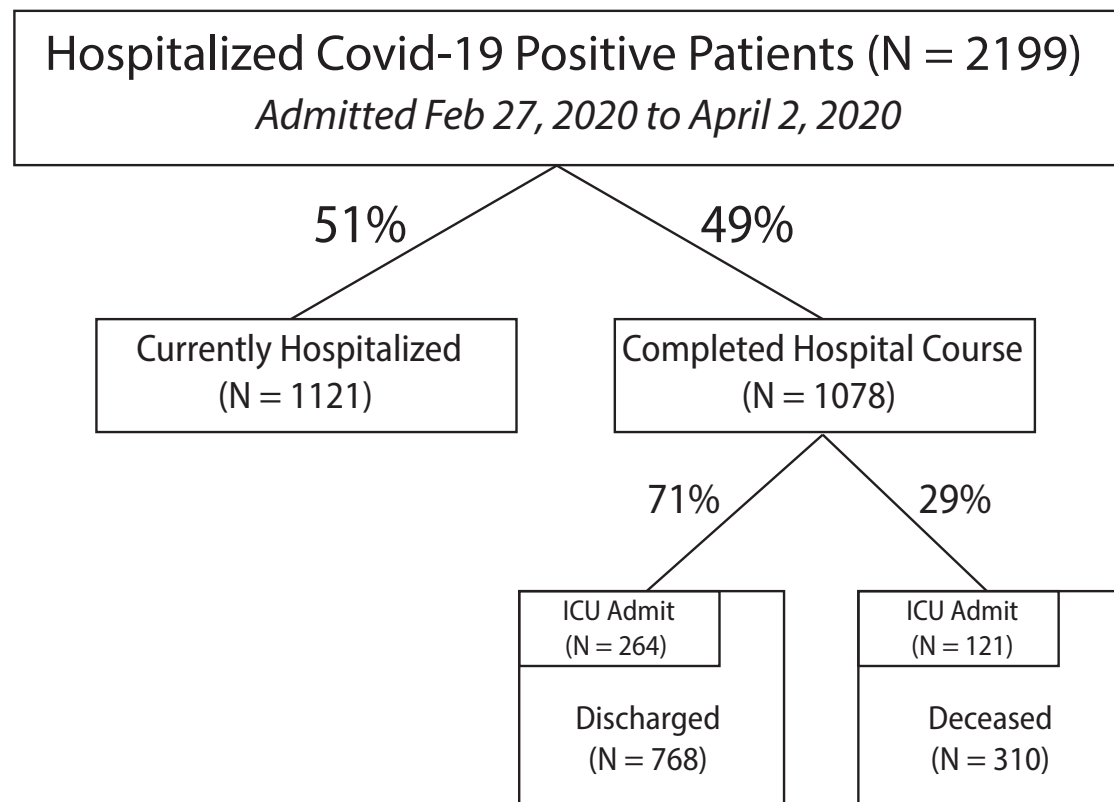

Supplement: inline-supplementary-material-1 [file inline-supplementary-material-1.pdf]
