# Supplementary material
Source: HighWire-hosted journal article supplement (https://bmjopen.bmj.com/content/10/11/e040736)
Supplement: inline-supplementary-material-3 [file inline-supplementary-material-3.pdf]

## Supplementary Material

### Supplementary Methods

#### Mount Sinai Covid Informatics Center (MSCIC) Data Platform

This dataset of clinical data is the first part of a larger effort that aims to create an heterogeneous collection of COVID-19 patient data. This effort brings together different stakeholders from MSHS, including research faculty, data scientists, clinicians, and hospital administrators, among others. The resulting dataset includes or will include longitudinal electronic health record (EHR) patient clinical data, multi-omics, such as genomics, imaging, such as chest CT scans, among others. The data, which are updated on a daily basis, is made available within a secure computational framework based on internal Microsoft Azure Cloud to researchers and analysts within the MSHS and the Icahn School of Medicine at Mount Sinai. This dataset is intended to foster research projects to improve the knowledge of this disease and augment clinical operations with machine intelligence.

### Supplementary Figures

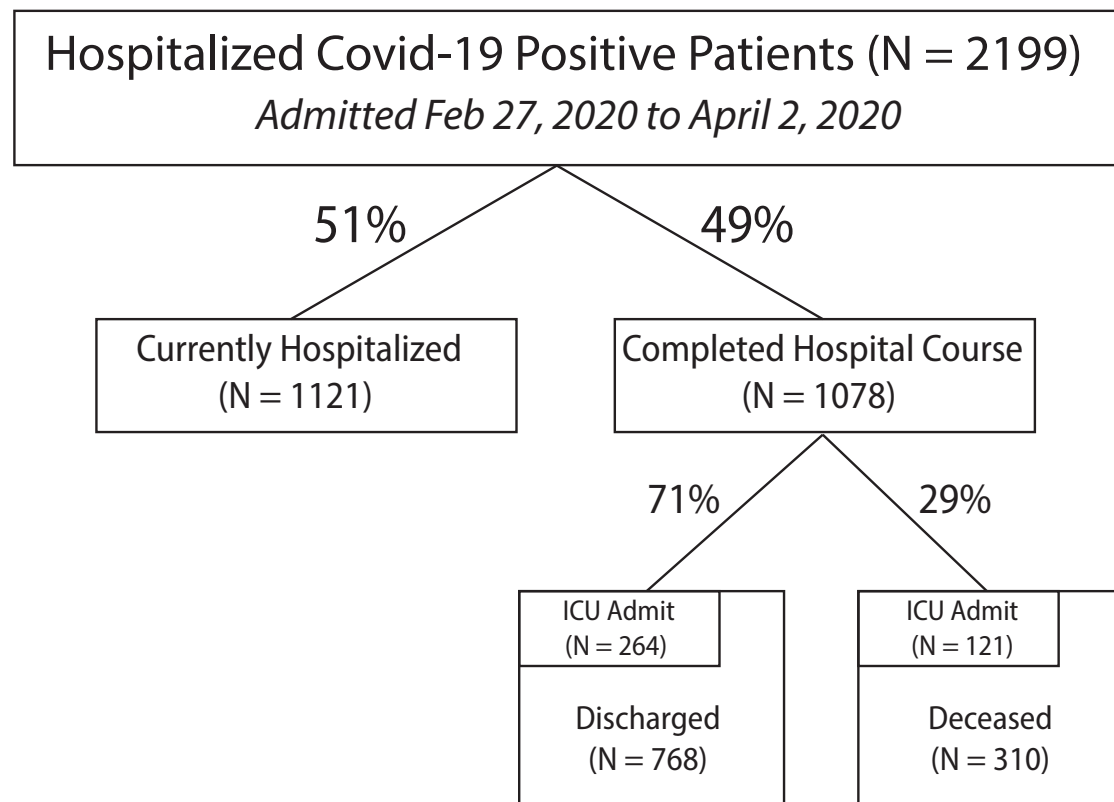

**Supplementary Figure 1:** Flowchart of patients included in study cohort. All patients had a confirmed COVID-19 qPCR from a nasopharyngeal swab. Patients were stratified by completion of hospital course.

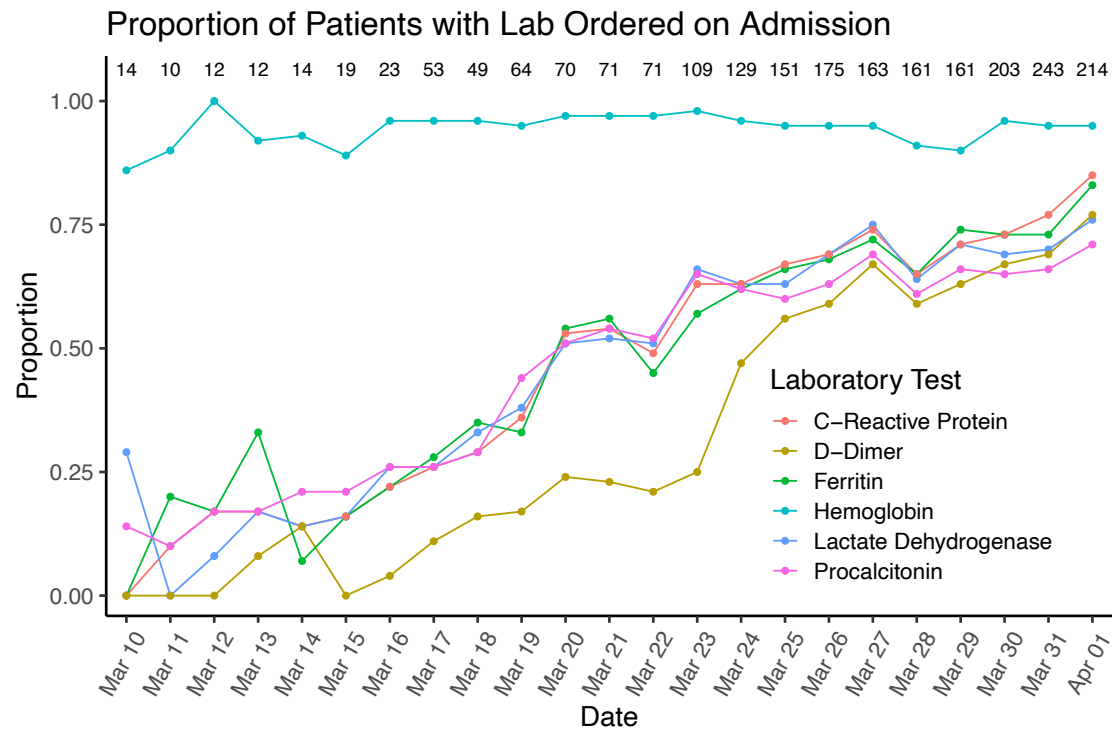

**Supplementary Figure 2** Trends in laboratory test orders per day. Tests that comprised the Mount Sinai Health System COVID-19 special order (C-reactive protein, d-dimer, ferritin, hemoglobin, lactate dehydrogenase, procalcitonin) set were included. Number of orders of hemoglobin were also included as a comparison. We only included dates in which there were at least 10 COVID-19 patients admitted (i.e., 03/10/2020). We included data up to 04/01/2020 to leave a full 24 hours for the tests to be ordered.
